# Supplementary material for: A Qualitative Evaluation of the Barriers and Enablers for Implementation of an Asymptomatic SARS-CoV-2 Testing Service at the University of Nottingham: A Multi-Site Higher Education Setting in England
Source: Int J Environ Res Public Health. 2022 Oct 12;19(20):13140. doi: 10.3390/ijerph192013140 (PMC9603241; doi:10.3390/ijerph192013140)
Supplement: Supplementary file 1 [file ijerph-19-13140-s001.zip]

Archive with 4 entries (4 files):
- __MACOSX/._S1_Interview Topic Guide.pdf
- __MACOSX/._S2_Participant characteristics.pdf
- S1_Interview Topic Guide.pdf
- S2_Participant characteristics.pdf
