# Supplementary material for: A Qualitative Evaluation of the Barriers and Enablers for Implementation of an Asymptomatic SARS-CoV-2 Testing Service at the University of Nottingham: A Multi-Site Higher Education Setting in England
Source: Int J Environ Res Public Health. 2022 Oct 12;19(20):13140. doi: 10.3390/ijerph192013140 (PMC9603241; doi:10.3390/ijerph192013140)
Supplement: Supplementary file 1 [file ijerph-19-13140-s001.zip › S2_Participant characteristics.pdf]

**Table S1.** Participant characteristics.

| Respondent | Gender <sup>a</sup> | Age   | Job role <sup>b</sup> |
|------------|---------------------|-------|-----------------------|
| 1          | F                   | 20-30 | Research              |
| 2          | F                   | 20-30 | Research              |
| 3          | M                   | 31-40 | Laboratory            |
| 4          | F                   | 61-70 | APM <sup>c</sup>      |
| 5          | F                   | 31-40 | APM                   |
| 6          | F                   | 61-70 | Laboratory            |
| 7          | M                   | 31-40 | Laboratory            |
| 8          | M                   | 41-50 | Research              |
| 9          | F                   | 31-40 | Laboratory            |
| 10         | M                   | 21-30 | Laboratory            |
| 11         | F                   | 31-40 | Laboratory            |
| 12         | M                   | 41-50 | Research              |
| 13         | F                   | 51-60 | APM                   |
| 14         | F                   | 20-30 | APM                   |
| 15         | F                   | 31-40 | Laboratory            |
| 16         | F                   | 51-60 | APM                   |
| 17         | M                   | 31-40 | APM                   |
| 18         | F                   | 51-60 | Laboratory            |
| 19         | F                   | 20-30 | Research              |
| 20         | F                   | 41-50 | Research              |
| 21         | F                   | 20-30 | APM                   |
| 22         | F                   | 61-70 | APM                   |
| 23         | M                   | 61-70 | Research              |
| 24         | M                   | 31-40 | Other <sup>d</sup>    |
| 25         | M                   | 41-50 | APM                   |

<sup>a</sup>F=female, M=male; <sup>b</sup>prior to joining the ATS; <sup>c</sup>Administrative, professional and managerial; <sup>d</sup>Other: IT or technical.
